# Supplementary material for: Development of a nurse knowledge, attitude and practice questionnaire on protocolized weaning from invasive mechanical ventilation
Source: Research Square preprint supplement (doi:10.21203/rs.3.rs-8466677/v1), 2026-01-22
Supplement: Supplementary file 1 [file 4a24a820dce896783954542a.docx]

**The final questionnaire on the knowledge, attitudes and practices of ICU nurses' IMV protocolized weaning**

**Part 1. Knowledge Dimension Questionnaire: For questions that do not specify multiple choices, you can only select one answer. There is no difference whether you answer correctly or incorrectly. Please fill in according to your true situation.**

1. Protocolized weaning also called programmatic weaning, which refers to the development of methods and steps for weaning based on respiratory physiology and clinical parameters, and each step has a certain standard. [Single choice]

A. Right B. Wrong C. Unclear

2. Protocolized weaning mainly includes three steps: weaning screening assessment, spontaneous breathing test (SBT) and tracheal extubation. [Single choice]

A. Right B. Wrong C. Unclear

3. SBT should be performed on patients who have been passed the weaning screening assessment. [Single choice]

A. Right B. Wrong C. Unclear

4. SBT is a method of assessing a patient's readiness for weaning by decreasing the degree of ventilator support or withholding ventilator support. [Single choice]

A. Right B. Wrong C. Unclear

5. It is important to return to the ventilation mode and parameter settings before SBT immediately if the SBT failure, give sufficient ventilation support to relieve respiratory muscle fatigue, and check the cause of failure. [Single choice]

A. Right B. Wrong C. Unclear

6. The airway patency and protection should be assessed before extubation. The degree of airway patency is assessed primarily using cuff leak; the assess of airway protection ability including cough strength, level of consciousness, secretion volume, and swallowing function. [Single choice]

A. Right B. Wrong C. Unclear

7. In weaning screening assessment, what conditions can the patient meet for SBT? [Multiple choice]

A.The causes leading to mechanical ventilation have been eliminated or improved

B. The ability to breathe independently

C. Stable hemodynamics and metabolism

D. FiO2 ≤ 40%, PEEP ≤ 5-8 cmH2O

E. Consciousness is clear or easily awakened

8. What happens during SBT we should consider the patient fail of the SBT? [Multiple choice]

A. Respiratory rate > 35 breaths/min or increase by ≥ 50% or respiratory distress

B. Heart rate > 140 beats/min or increase by ≥ 20% or heart rate < 50 beats/min or arrhythmia occurs

C. Systolic blood pressure > 180 mmHg or increase > 20%, or < 90 mmHg

D. SpO2 < 90% or PaO2 < 50 mmHg or PaCO2 increases > 10 mmHg

E. Changes in consciousness, such as drowsiness, agitation, or delirium

9. In addition to the sedation related SBT failure, how many times per day is it advisable to perform SBT after the cause of SBT failure has been corrected? [Single choice]

A. One B. Two C. Unclear

10.The time of SBT is generally 30min, and not more than 2H at most. [Single choice]

A. Right B. Wrong C. Unclear

11.What are the common ways of SBT? [Multiple choice]

A. T-tube oxygen supply

B. Low-level PSV

C. High-level PSV

D. Low-level continuous positive airway pressure (CPAP)

12.There is no need to increase the body's oxygen reserve before extubation. [single choice]

A. Right B. Wrong C. Unclear

13. The secretions in the mouth, nose, pharynx, supraglottis and airway should be cleaned before extubation. [single choice]

A. Right B. Wrong C. Unclear

**Part 2. Attitude Dimension Questionnaire (Please select the option that best represents your true thoughts)**

1. I think the knowledge related to protocolized weaning is very important.

A. Strongly Disagree B. Disagree C. Uncertain D. Agree E. Strongly Agree

2. I think protocolized weaning is more standardized than empirical weaning.

A. Strongly Disagree B. Disagree C. Uncertain D. Agree E. Strongly Agree

3. I think the implementation of protocolized weaning can shorten the time of MV, weaning time and ICU stay time.

A. Strongly Disagree B. Disagree C. Uncertain D. Agree E. Strongly Agree

4. I think the implementation of protocolized weaning can reduce the complications of MV and reduce medical costs.

A. Strongly Disagree B. Disagree C. Uncertain D. Agree E. Strongly Agree

5. I think ICU should formulate a weaning plan based on evidence to optimize the clinical implementation of protocolized weaning.

A. Strongly Disagree B. Disagree C. Uncertain D. Agree E. Strongly Agree

6. I think ICU nurses should master the knowledge of protocolized weaning.

A. Strongly Disagree B. Disagree C. Uncertain D. Agree E. Strongly Agree

7. I think the implementation of the protocolized weaning program can promote the common understanding of doctors and nurses on the weaning process, enhance professional cooperation and improve the weaning efficiency.

A. Strongly Disagree B. Disagree C. Uncertain D. Agree E. Strongly Agree

8. I think ICU nurses play an important role in ventilator weaning.

A. Strongly Disagree B. Disagree C. Uncertain D. Agree E. Strongly Agree

9. I think ICU nurses can lead the implementation of protocolized weaning after training.

A. Strongly Disagree B. Disagree C. Uncertain D. Agree E. Strongly Agree

10. I think the implementation of ICU nurse led protocolized weaning program can ensure the safety of patients.

A. Strongly Disagree B. Disagree C. Uncertain D. Agree E. Strongly Agree

11. I think ICU nurses should take the initiative to do ventilator liberation assessment of patients with mechanical ventilation.

A. Strongly Disagree B. Disagree C. Uncertain D. Agree E. Strongly Agree

12. I am interested in the role and responsibility of protocolized weaning.

A. Strongly Disagree B. Disagree C. Uncertain D. Agree E. Strongly Agree

13. I am interested in the knowledge of protocolized weaning.

1. A. Strongly Disagree B. Disagree C. Uncertain D. Agree E. Strongly Agree
2. ICU should conduct training knowledge related to protocolized weaning regularly.

A. Strongly Disagree B. Disagree C. Uncertain D. Agree E. Strongly Agree

15. I would like to participate in training on knowledge or skills related to protocolized weaning.

A. Strongly Disagree B. Disagree C. Uncertain D. Agree E. Strongly Agree

**Part 3. Practice Dimension Questionnaire (Please select the option that best suits your situation based on your actual circumstances)**

1. I have taken the initiative to learn the knowledge about protocolized weaning.

A. Never B. Occasionally C. Sometimes D. Often E. Always

2. I actively carry out screening liberation assessment for patients with mechanical ventilation in my work.

A. Never B. Occasionally C. Sometimes D. Often E. Always

3. At work, I actively communicate with doctors about the sedation goals of patients with mechanical ventilation and implement sedation.

A. Never B. Occasionally C. Sometimes D. Often E. Always

4. I take the initiative to check the patient's blood gas report to assess whether the patient meets the standard of weaning.

A. Never B. Occasionally C. Sometimes D. Often E. Always

5. I actively discuss with the doctor or respiratory therapist whether the patient has met the weaning standard.

A. Never B. Occasionally C. Sometimes D. Often E. Always

6. After the weaning screening assessment, if the patient meets the weaning criteria, I will implement SBT and extubate as soon as possible.

A. Never B. Occasionally C. Sometimes D. Often E. Always

7. During SBT, I will actively assess the patient's tolerance, including respiratory mode, whether the gas exchange is sufficient, hemodynamic stability and subjective comfort, etc.

A. Never B. Occasionally C. Sometimes D. Often E. Always

8. For patients who have failed SBT, I will immediately return to the ventilator settings before SBT, let the patient rest and inform the doctor.

A. Never B. Occasionally C. Sometimes D. Often E. Always

9. Before extubation, I will assess whether the patient's consciousness, muscle strength, vital signs and other indicators meet the extubation standard.

A. Never B. Occasionally C. Sometimes D. Often E. Always

10. I will explain the operation techniques to the patient before extubation to obtain cooperation.

A. Never B. Occasionally C. Sometimes D. Often E. Always

11. After extubation, I will carefully monitor the patient's vital signs, state of consciousness, expectoration ability, teach and encourage the patient to cough up sputum independently.

A. Never B. Occasionally C. Sometimes D. Often E. Always
